# Supplementary material for: Paper-based transparent flexible thin film supercapacitors
Source: Royal Society of Chemistry journal article supplement (doi:10.1039/c3nr00674c), 2013-01-01
Supplement: c3nr00674c.pdf [file c3nr00674c.pdf]

## Supporting Information For

### **Paper-based transparent flexible thin film supercapacitors**

#### **Preparation of CNFs/[RGO]<sub>n</sub> hybrid paper**

The CNFs paper can be prepared by the static evaporation of the water in the PTFE (polytetrafluoroethylene) petri dishes at 60 °C for 4 h and then at room temperature for desired time. The CNFs paper was first dipped into the Cu<sup>2+</sup> solution (1 mg/ml, pH 4.5) for 1 min, rinsed by the DI water, and then dried with hot air (about 65 °C). Subsequently, the paper was dipped into the GO suspension (1 mg/ml, pH 4.5) for 1 min, followed by similar rinsing and drying. The above cycle can be repeated until obtain desired number of times, n. CNFs/[Cu<sup>2+</sup>/GO]<sub>n</sub> hybrid paper was reduced by HI acid at 80 °C for 10 seconds and called CNFs/[RGO]<sub>n</sub> hybrid paper where n is the number of cycles.

#### **Preparation of the transparent flexible thin film supercapacitors**

6 g of H<sub>2</sub>SO<sub>4</sub> was added into 60 ml of deionized water, and then 6 g of PVA was added with continuous stirring at 80 °C until the solution became clear. Two pieces of CNFs/[RGO]<sub>n</sub> hybrid paper (the edge of one side glued to the aluminum foil with silver paste) were soaked in the H<sub>2</sub>SO<sub>4</sub>-polyvinyl (PVA) gel electrolyte for 15 min and picked out. after that, two electrode paper were left in the fume hood at room temperature for about 4 h to vaporize the excess water, then the two electrode paper were assembled into all-solid-state flexible supercapacitors under a pressure of 0.2 MPa.

#### **Characterization of cellulose nanofibers**

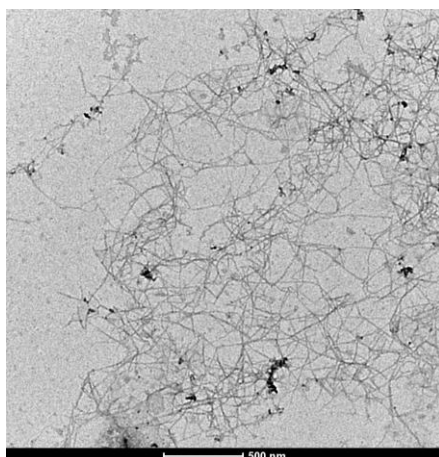

Fig.S1 TEM image of cellulose nanofiber samples

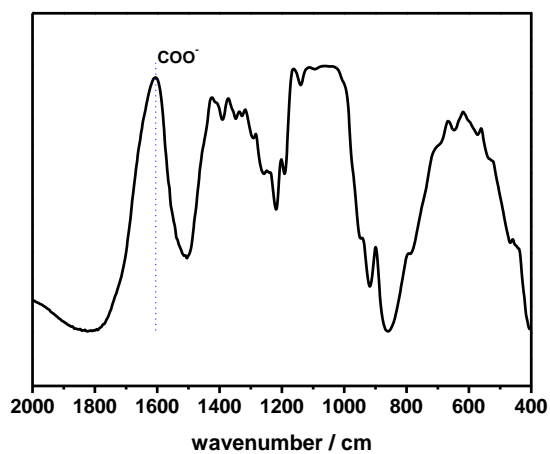

Fig.S2 FT-IR spectra of cellulose nanofiber samples

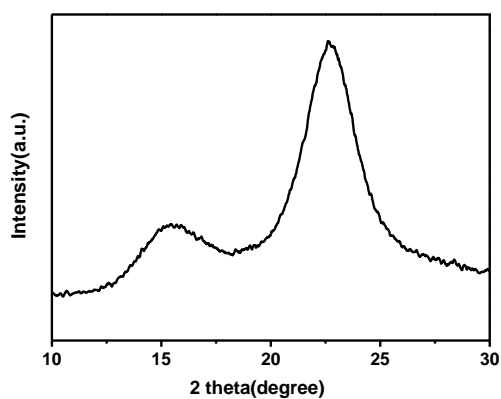

Fig.S3 XRD spectra of cellulose nanofiber samples

### Characterization of GO

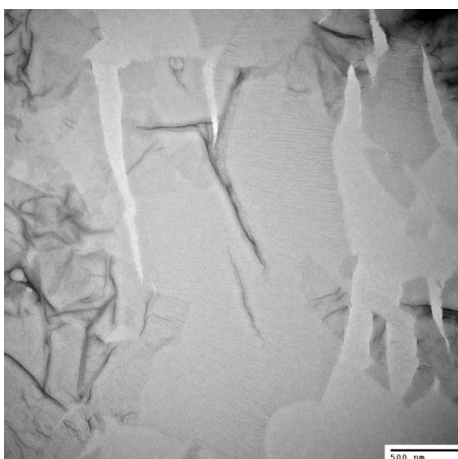

Fig.S4 TEM image of GO nanosheets

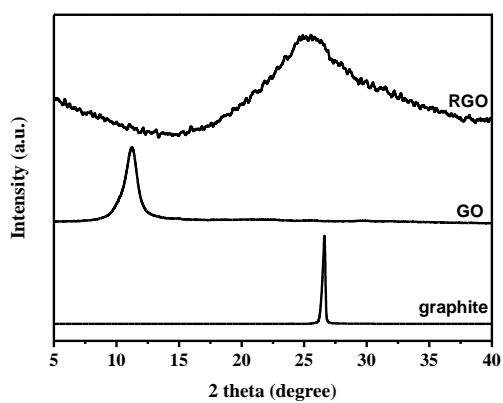

Fig.S5 XRD spectras of GO, RGO, and graphite

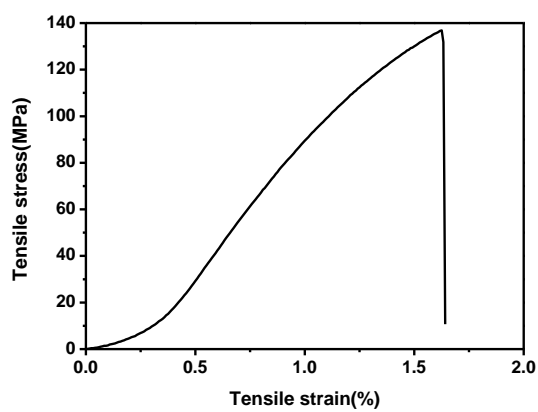

Fig.S6 Stress-strain curve of CNFs/[RGO]<sub>20</sub> hybrid paper

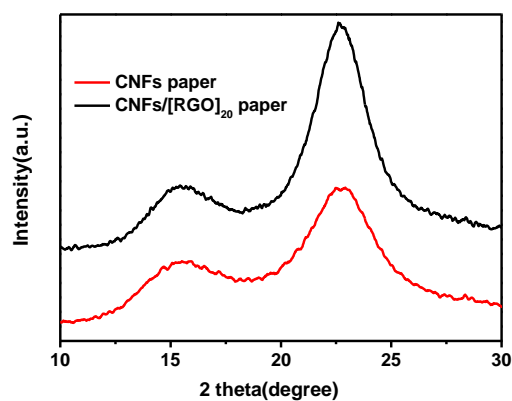

Fig.S7 XRD spectras of CNFs paper and CNFs/[RGO]<sub>20</sub> hybrid paper

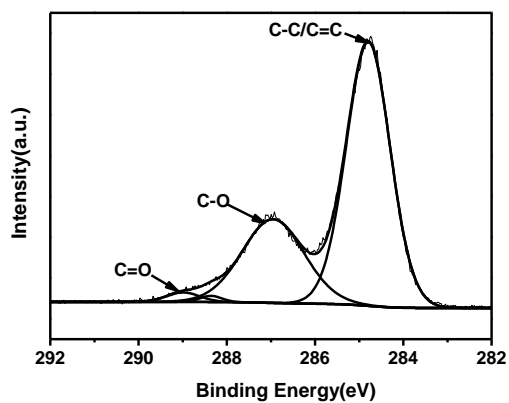

Fig.S8 High-resolution C1s spectra of GO nanosheets

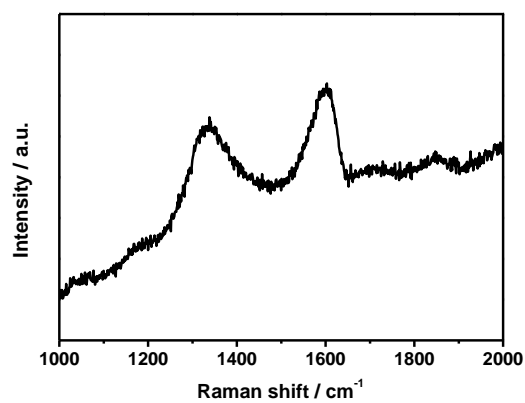

Fig.S9 Raman spectra of GO nanosheets

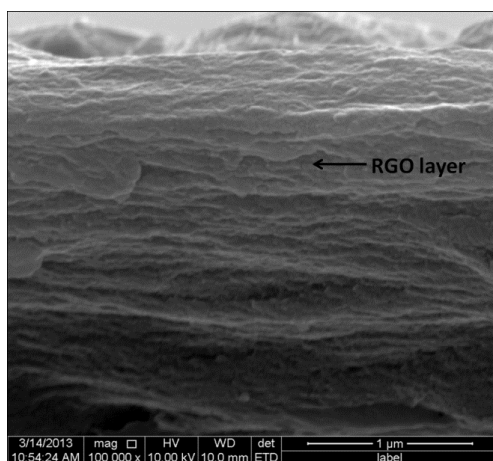

Fig.S10 Cross-sectional FESEM image of CNFs/[RGO]<sub>20</sub> hybrid paper

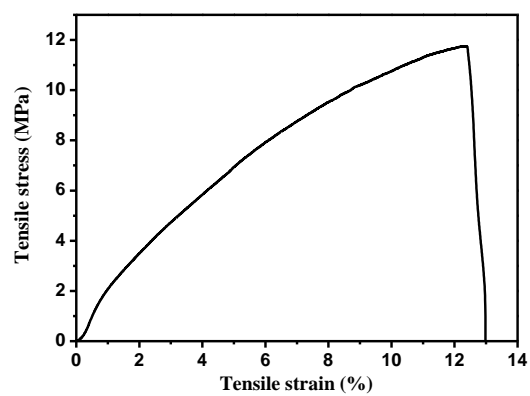

Fig.S11 Stress-strain curve of T-SC-20
